# Supplementary material
Source: HighWire-hosted journal article supplement (https://www.cmajopen.ca/highwire/filestream/89388/field_highwire_adjunct_files/0/open-2022-0089-cheers-checklist.pdf)
Supplement: open-2022-0089-cheers-checklist.pdf [file open-2022-0089-cheers-checklist.pdf]

## CHEERS 2022 Checklist

| Topic                                | No. | Item                                                                                                                            | Location where item is reported |
|--------------------------------------|-----|---------------------------------------------------------------------------------------------------------------------------------|---------------------------------|
| <b>Title</b>                         |     |                                                                                                                                 |                                 |
|                                      | 1   | Identify the study as an economic evaluation and specify the interventions being compared.                                      | Not Applicable                  |
| <b>Abstract</b>                      |     |                                                                                                                                 |                                 |
|                                      | 2   | Provide a structured summary that highlights context, key methods, results, and alternative analyses.                           | Page 2                          |
| <b>Introduction</b>                  |     |                                                                                                                                 |                                 |
| <b>Background and objectives</b>     | 3   | Give the context for the study, the study question, and its practical relevance for decision making in policy or practice.      | Page 3                          |
| <b>Methods</b>                       |     |                                                                                                                                 |                                 |
| <b>Health economic analysis plan</b> | 4   | Indicate whether a health economic analysis plan was developed and where available.                                             | Not Applicable                  |
| <b>Study population</b>              | 5   | Describe characteristics of the study population (such as age range, demographics, socioeconomic, or clinical characteristics). | Table 2 on page 13              |
| <b>Setting and location</b>          | 6   | Provide relevant contextual information that may influence findings.                                                            | Page 4                          |
| <b>Comparators</b>                   | 7   | Describe the interventions or strategies being compared and why chosen.                                                         | Not Applicable                  |
| <b>Perspective</b>                   | 8   | State the perspective(s) adopted by the study and why chosen.                                                                   | Page 4                          |
| <b>Time horizon</b>                  | 9   | State the time horizon for the study and why appropriate.                                                                       | Page 4                          |
| <b>Discount rate</b>                 | 10  | Report the discount rate(s) and reason chosen.                                                                                  | Page 4                          |
| <b>Selection of outcomes</b>         | 11  | Describe what outcomes were used as the measure(s) of benefit(s) and harm(s).                                                   | Table 1 on page 12              |
| <b>Measurement of outcomes</b>       | 12  | Describe how outcomes used to capture benefit(s) and harm(s) were measured.                                                     | Pages 5-6                       |

| <b>Topic</b>                                                                 | <b>No.</b> | <b>Item</b>                                                                                                                                                                   | <b>Location where item is reported</b> |
|------------------------------------------------------------------------------|------------|-------------------------------------------------------------------------------------------------------------------------------------------------------------------------------|----------------------------------------|
| <b>Valuation of outcomes</b>                                                 | 13         | Describe the population and methods used to measure and value outcomes.                                                                                                       | Pages 5-6                              |
| <b>Measurement and valuation of resources and costs</b>                      | 14         | Describe how costs were valued.                                                                                                                                               | Page 6                                 |
| <b>Currency, price date, and conversion</b>                                  | 15         | Report the dates of the estimated resource quantities and unit costs, plus the currency and year of conversion.                                                               | Page 4                                 |
| <b>Rationale and description of model</b>                                    | 16         | If modelling is used, describe in detail and why used. Report if the model is publicly available and where it can be accessed.                                                | Page 5                                 |
| <b>Analytics and assumptions</b>                                             | 17         | Describe any methods for analysing or statistically transforming data, any extrapolation methods, and approaches for validating any model used.                               | Not Applicable                         |
| <b>Characterising heterogeneity</b>                                          | 18         | Describe any methods used for estimating how the results of the study vary for subgroups.                                                                                     | Not Applicable                         |
| <b>Characterising distributional effects</b>                                 | 19         | Describe how impacts are distributed across different individuals or adjustments made to reflect priority populations.                                                        | Not Applicable                         |
| <b>Characterising uncertainty</b>                                            | 20         | Describe methods to characterise any sources of uncertainty in the analysis.                                                                                                  | Page 5                                 |
| <b>Approach to engagement with patients and others affected by the study</b> | 21         | Describe any approaches to engage patients or service recipients, the general public, communities, or stakeholders (such as clinicians or payers) in the design of the study. | Not Applicable                         |
| <b>Results</b>                                                               |            |                                                                                                                                                                               |                                        |
| <b>Study parameters</b>                                                      | 22         | Report all analytic inputs (such as values, ranges, references) including uncertainty or distributional assumptions.                                                          | Not Applicable                         |
| <b>Summary of main results</b>                                               | 23         | Report the mean values for the main categories of costs and outcomes of interest and summarise them in the most appropriate overall measure.                                  | Pages 7-8 and Tables 2-5               |
| <b>Effect of uncertainty</b>                                                 | 24         | Describe how uncertainty about analytic judgments, inputs, or projections affect findings. Report the effect of choice of discount rate and time horizon, if applicable.      | Page 8 and Table 6                     |

| Topic                                                                       | No. | Item                                                                                                                                                    | Location where item is reported |
|-----------------------------------------------------------------------------|-----|---------------------------------------------------------------------------------------------------------------------------------------------------------|---------------------------------|
| <b>Effect of engagement with patients and others affected by the study</b>  | 25  | Report on any difference patient/service recipient, general public, community, or stakeholder involvement made to the approach or findings of the study | Not Applicable                  |
| <b>Discussion</b>                                                           |     |                                                                                                                                                         |                                 |
| <b>Study findings, limitations, generalisability, and current knowledge</b> | 26  | Report key findings, limitations, ethical or equity considerations not captured, and how these could affect patients, policy, or practice.              | Pages 8-10                      |
| <b>Other relevant information</b>                                           |     |                                                                                                                                                         |                                 |
| <b>Source of funding</b>                                                    | 27  | Describe how the study was funded and any role of the funder in the identification, design, conduct, and reporting of the analysis                      | Page 1                          |
| <b>Conflicts of interest</b>                                                | 28  | Report authors conflicts of interest according to journal or International Committee of Medical Journal Editors requirements.                           | Page 1                          |

From: Husereau D, Drummond M, Augustovski F, et al. Consolidated Health Economic Evaluation Reporting Standards 2022 (CHEERS 2022) Explanation and Elaboration: A Report of the ISPOR CHEERS II Good Practices Task Force. Value Health 2022;25. doi:10.1016/j.jval.2021.10.008
